# Supplementary material
Source: PubMed Central journal article supplement (PMC4914038)
Supplement: NIHMS772374-supplement-12.pdf [file NIHMS772374-supplement-12.pdf]

Statistics of the cryo-EM data collection and structural refinement

|                                           | <b>Agonists<br/>(Gly/Glu)</b> | <b>Agonists/modulator<br/>(Gly/Glu/Ro25-6891)</b> | <b>Antagonists<br/>(DCKA/D-APV)</b>          |
|-------------------------------------------|-------------------------------|---------------------------------------------------|----------------------------------------------|
| <b>Data collection</b>                    |                               |                                                   |                                              |
| Microscopy                                | Krios (UCLA)                  | Krios I (Janelia)                                 | Krios I (Janelia)                            |
| Voltage (kV)                              | 300                           | 300                                               | 300                                          |
| Defocus range ( $\mu\text{m}$ )           | -2.5 — -4.0                   | -1.5 — -3.5                                       | -1.5 — -3.0                                  |
| Pixel size ( $\text{\AA}$ )               | 1.07                          | 1.35                                              | 1.35                                         |
| Dose rate ( $\text{e}^-/\text{pixel/s}$ ) | 8.7                           | 10.2                                              | 10.5                                         |
| Total exposure time (s)                   | 8                             | 15                                                | 9.6                                          |
| Total frames per movie                    | 40                            | 50                                                | 32                                           |
| <b>Structural analysis</b>                |                               |                                                   |                                              |
| Micrographs                               | 3347                          | 2371                                              | 5523                                         |
| Initial particle processed                | 185009                        | 186539                                            | 393513                                       |
| Particles after 2D class average          | 172379                        | 134678                                            | 374728                                       |
| Particles refined                         | 116968                        | 87851                                             |                                              |
| Resolution (full-length, unmasked)        | 8.0 $\text{\AA}$              | 8.8 $\text{\AA}$                                  |                                              |
| Resolution (full-length, masked)          | 7.0 $\text{\AA}$              | 7.5 $\text{\AA}$                                  |                                              |
| Resolution (ECD, masked)                  | 6.7 $\text{\AA}$              | 7.0 $\text{\AA}$                                  |                                              |
|                                           |                               |                                                   | <b>Particles refined Resolution (masked)</b> |
|                                           |                               |                                                   | Class 1 (36907) 9.25 $\text{\AA}$            |
|                                           |                               |                                                   | Class 2 (38007) 13.5 $\text{\AA}$            |
|                                           |                               |                                                   | Class 3 (31605) 14.1 $\text{\AA}$            |
|                                           |                               |                                                   | Class 4 (36878) 13.5 $\text{\AA}$            |
|                                           |                               |                                                   | Class 5 (32608) 14.1 $\text{\AA}$            |
|                                           |                               |                                                   | Class 6 (18309) 15.4 $\text{\AA}$            |
