# Supplementary material
Source: PubMed Central journal article supplement (PMC4914038)

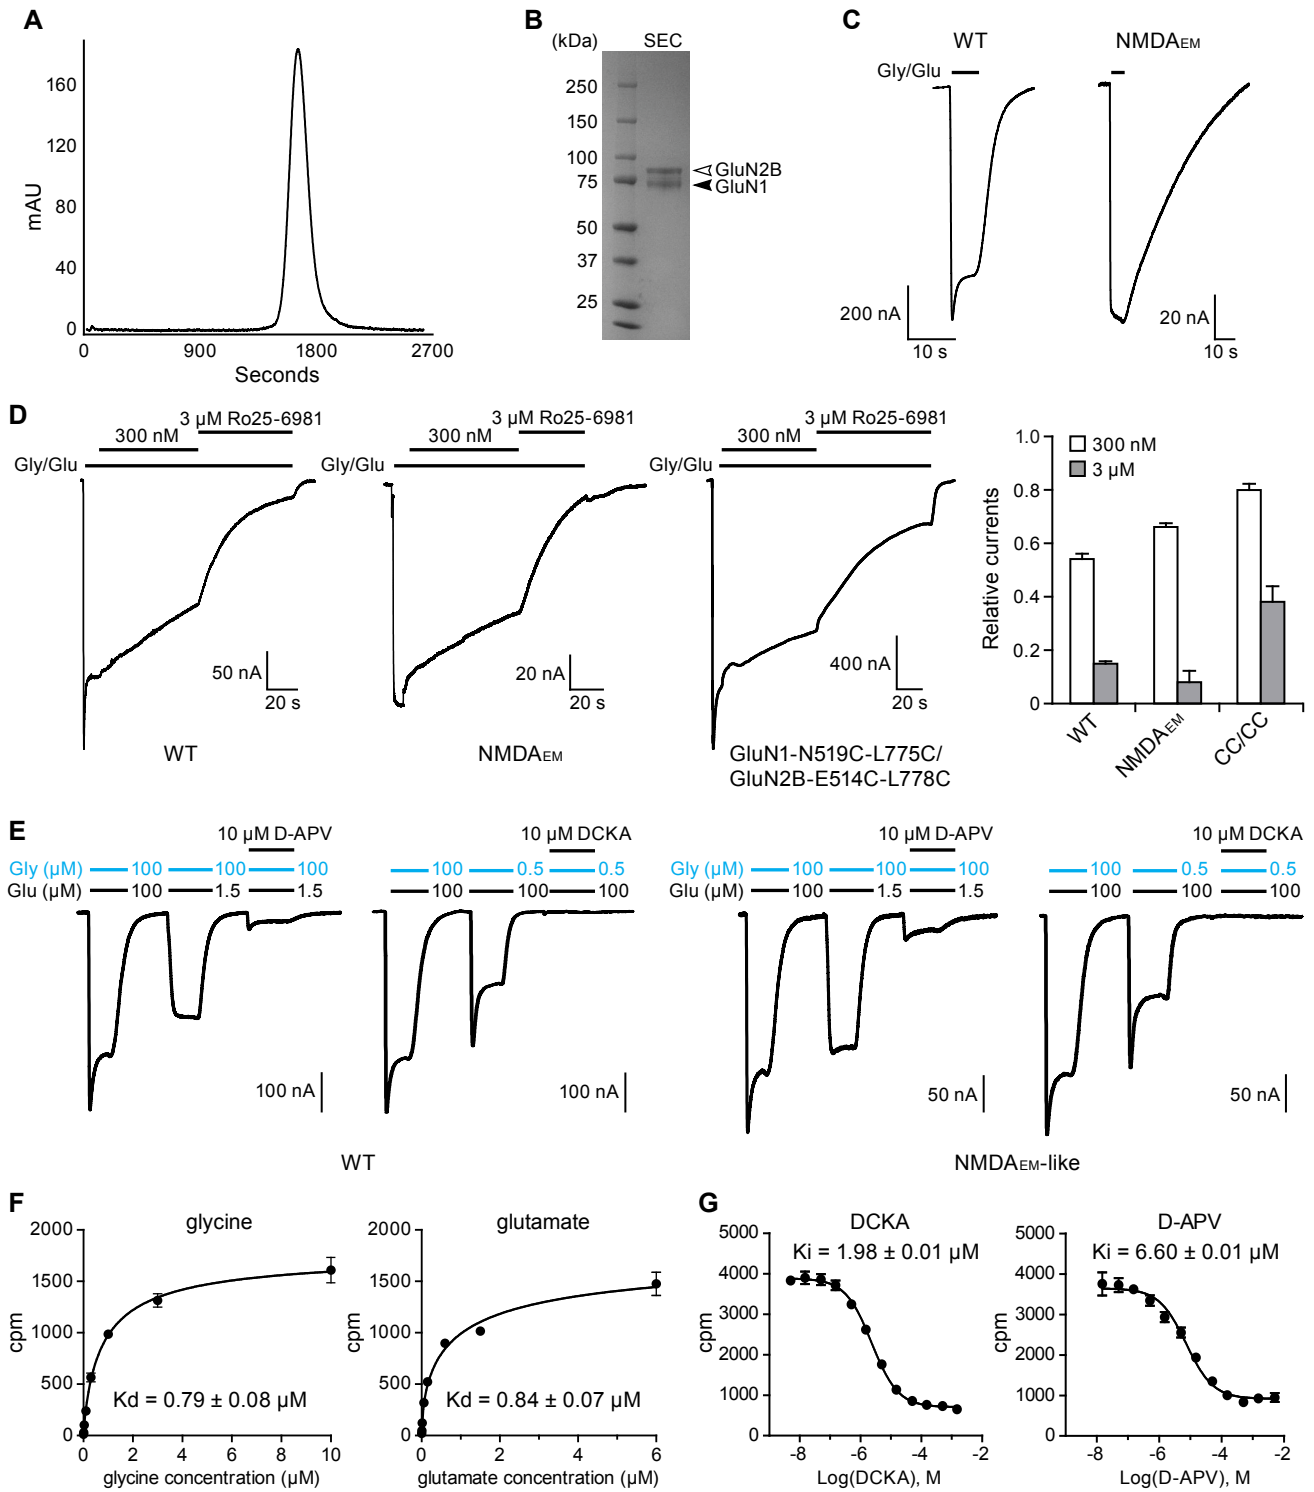

Zhu et al\_Figure S1

Supplement: NIHMS772374-supplement-3.pdf [file NIHMS772374-supplement-3.pdf]

**A**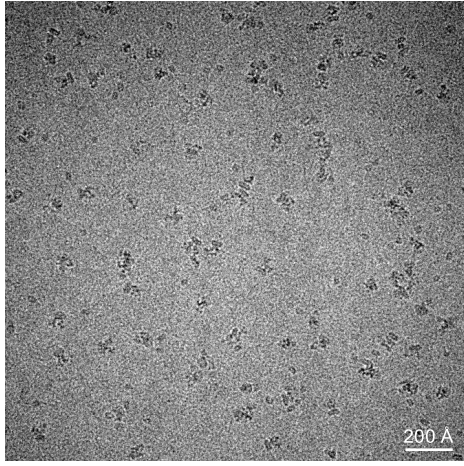**B**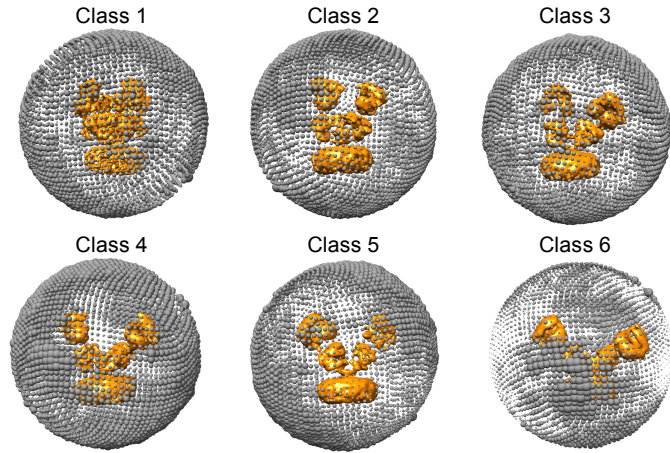**C**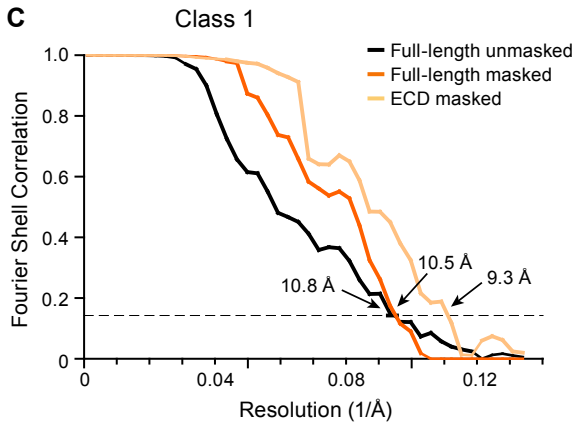**D**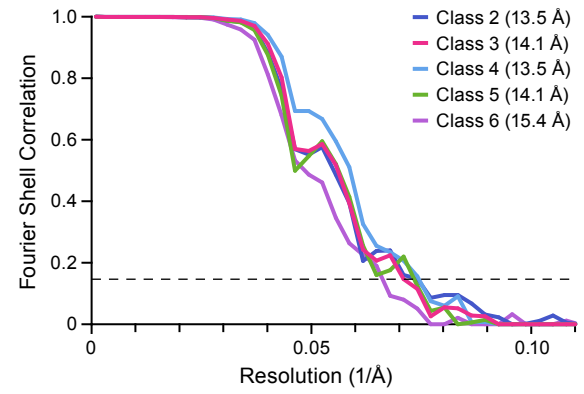

Supplement: NIHMS772374-supplement-4.pdf [file NIHMS772374-supplement-4.pdf]

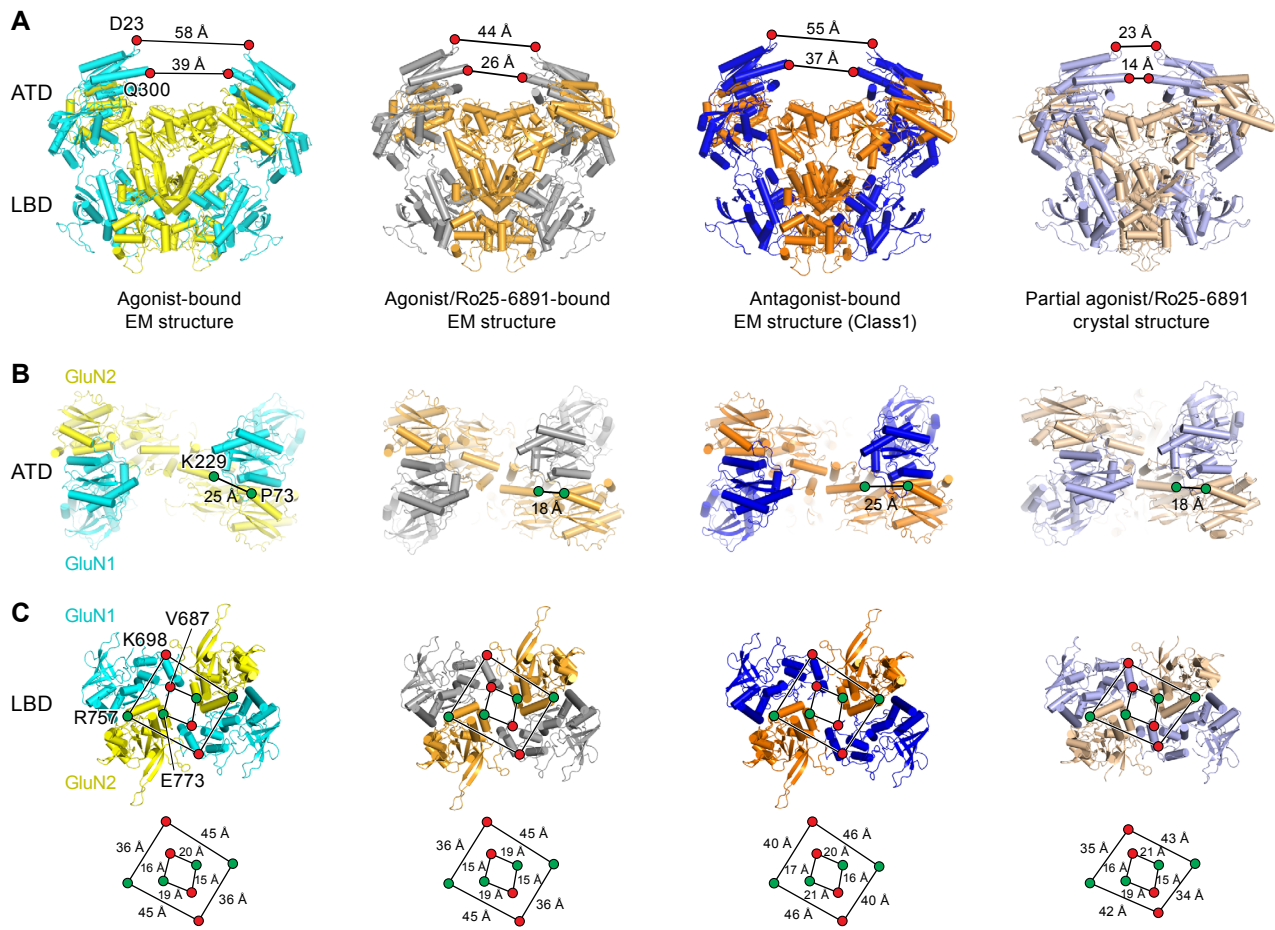

Zhu et al\_Figure S3

Supplement: NIHMS772374-supplement-5.pdf [file NIHMS772374-supplement-5.pdf]

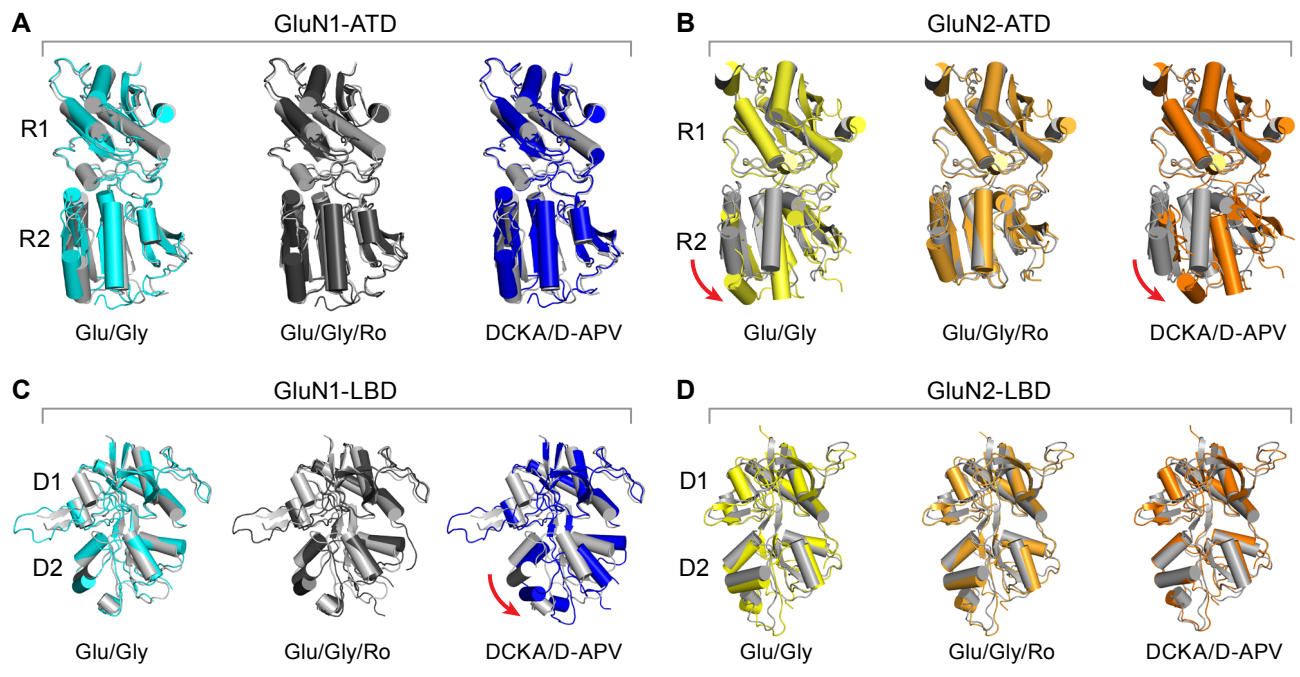

Supplement: NIHMS772374-supplement-6.pdf [file NIHMS772374-supplement-6.pdf]

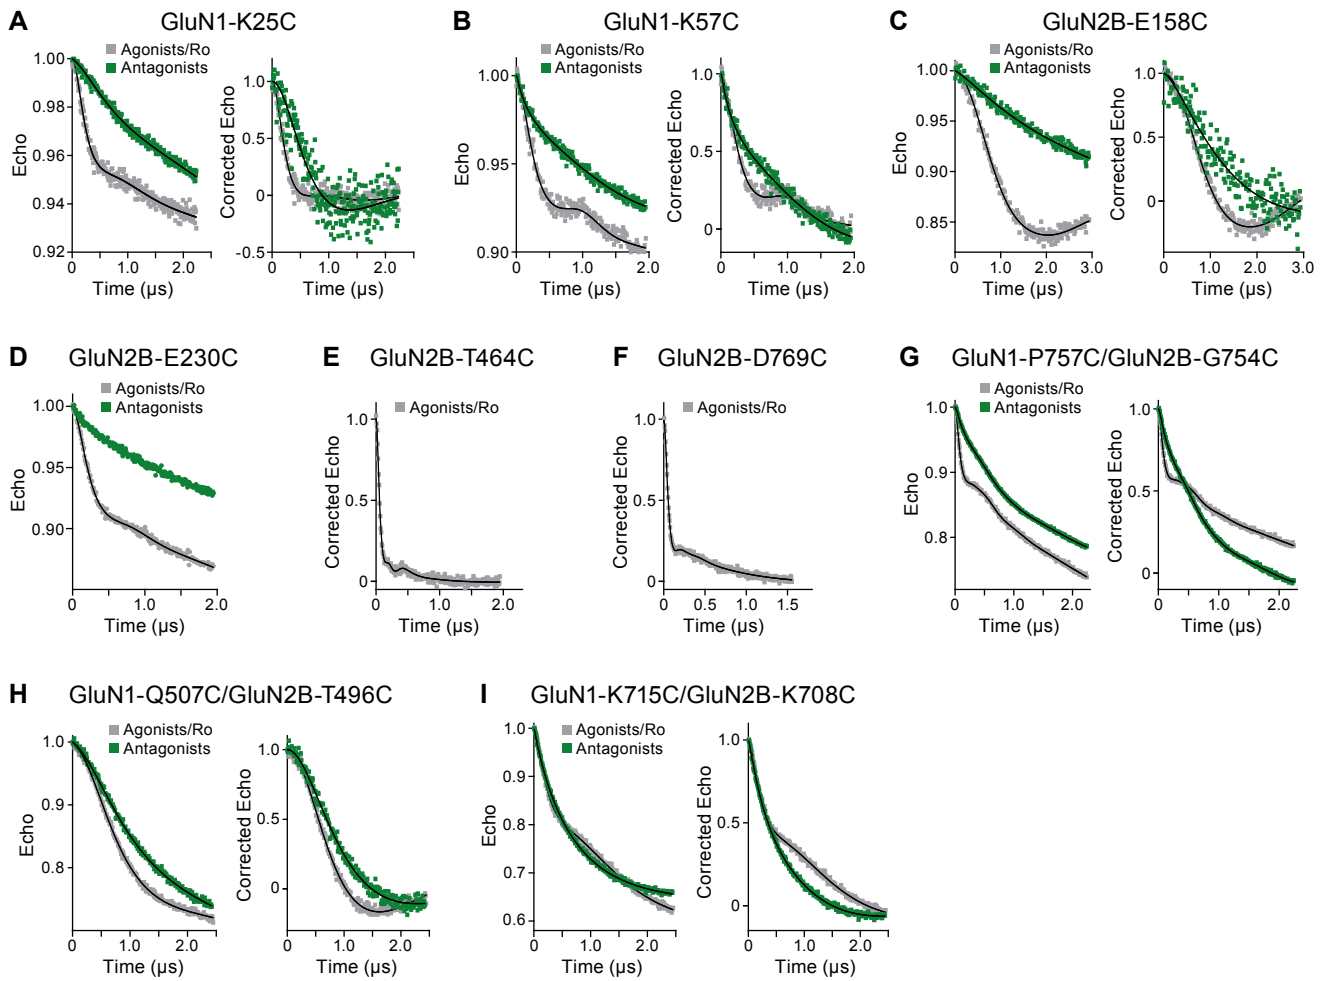

Zhu et al\_Figure S5

Supplement: NIHMS772374-supplement-7.pdf [file NIHMS772374-supplement-7.pdf]

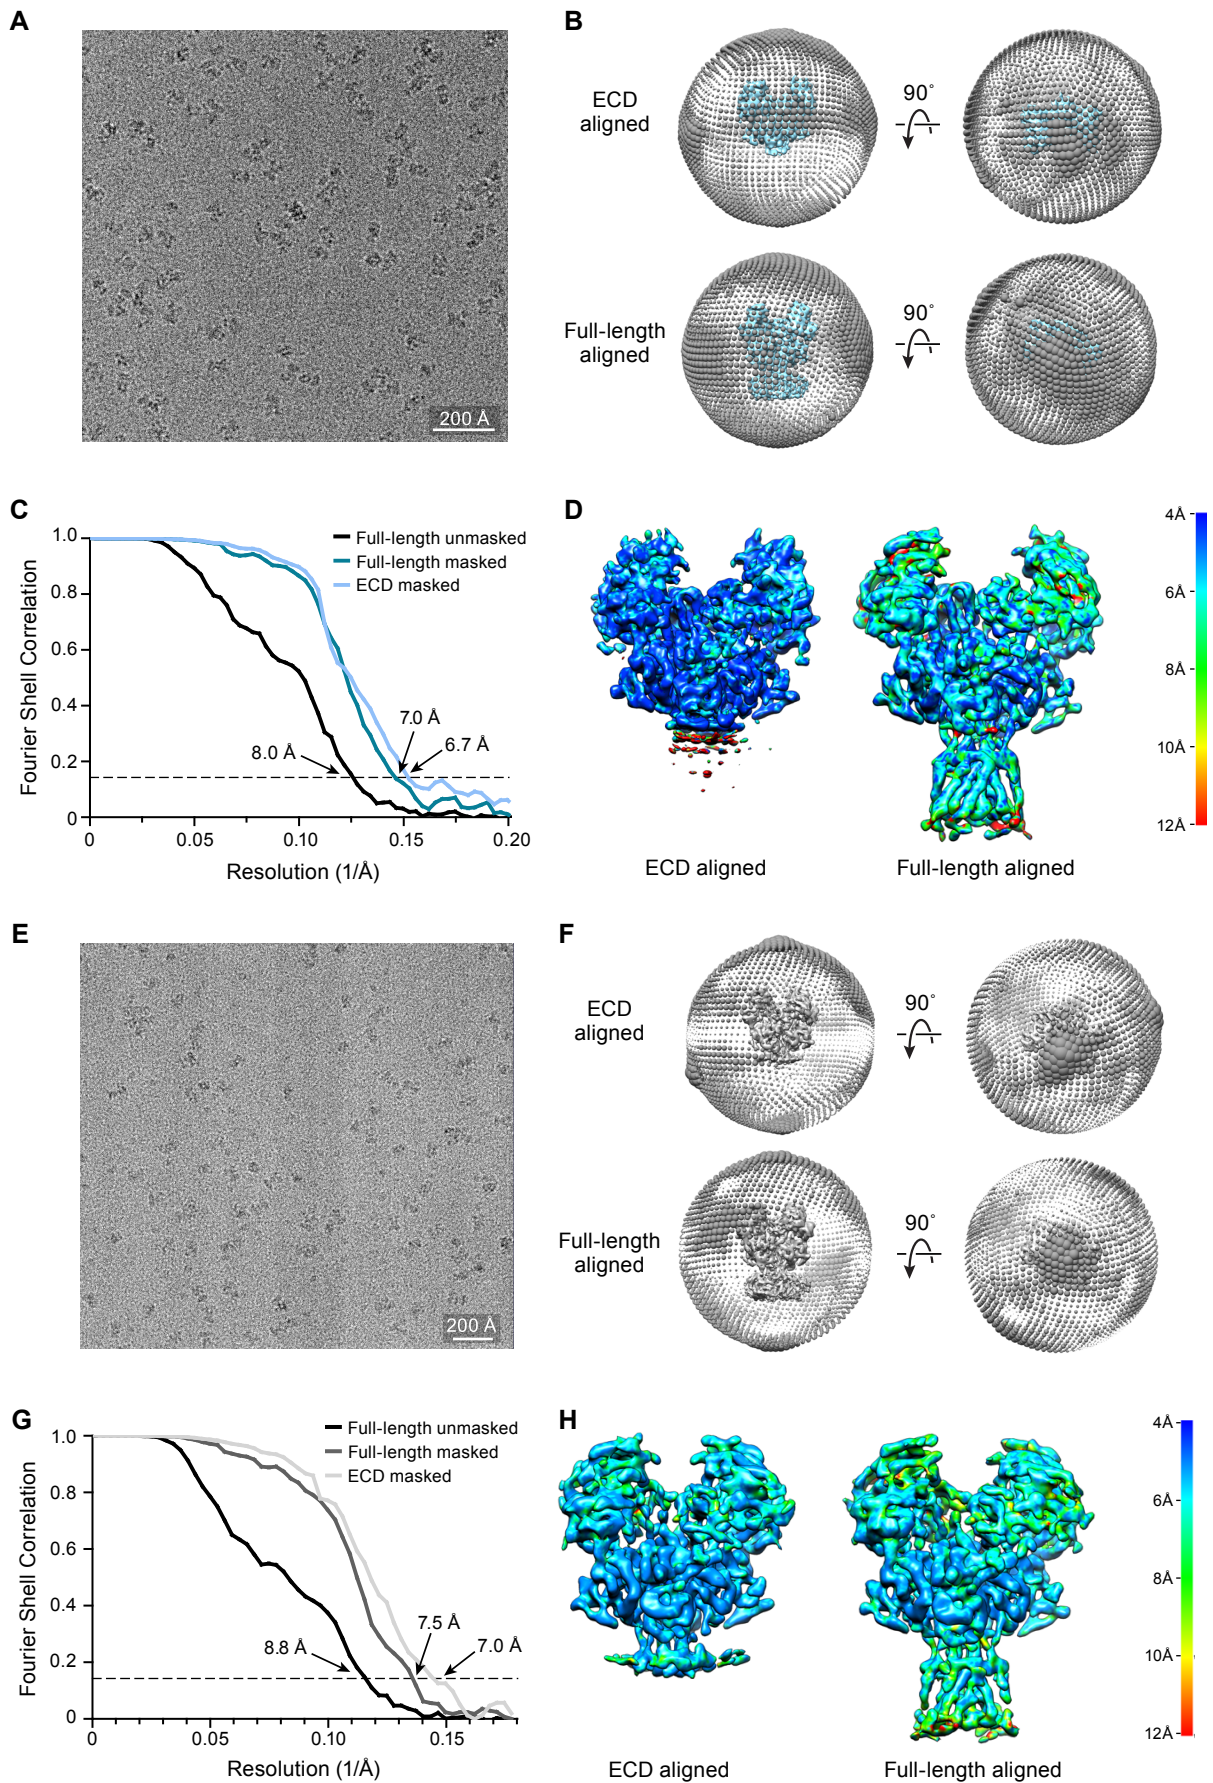

Zhu et al\_Figure S6

Supplement: NIHMS772374-supplement-8.pdf [file NIHMS772374-supplement-8.pdf]

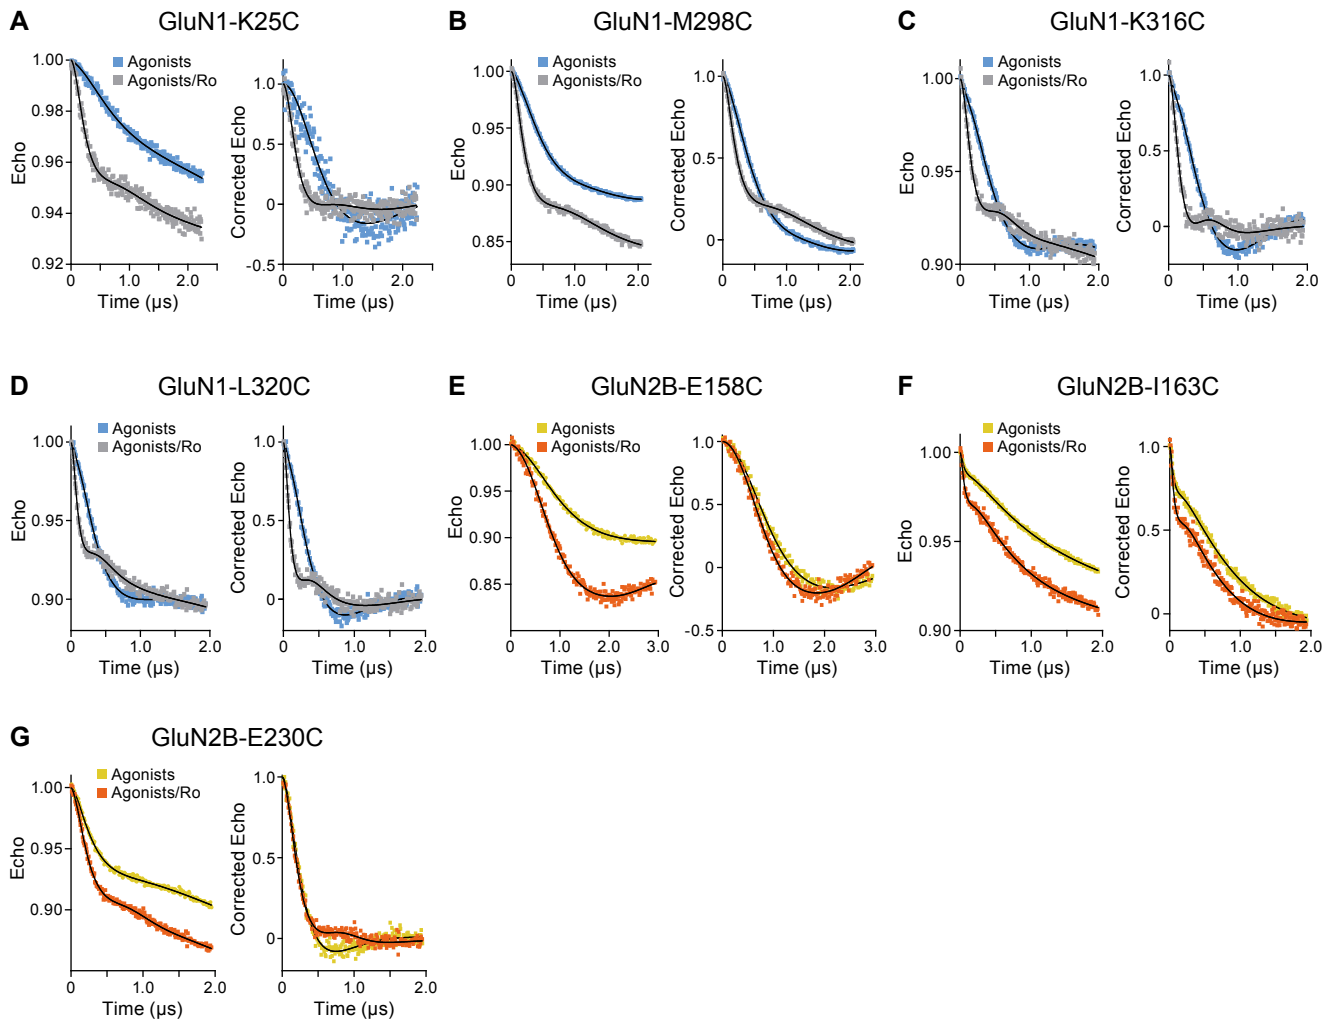

Supplement: NIHMS772374-supplement-9.pdf [file NIHMS772374-supplement-9.pdf]
